# Supplementary material for: Pectenotoxin-2 from Marine Sponges: A Potential Anti-Cancer Agent—A Review
Source: MDPI journal article supplement (doi:10.3390/md9112176), 2011-11-02
Supplement: s1 [file s1]

Correction

**Correction: Kim, G.-Y. *et al.* Pectenotoxin-2 from Marine Sponges: A Potential Anti-Cancer Agent—A Review. *Mar. Drugs* 2011, 9, 2176-2187**

Gi-Young Kim <sup>1</sup>, Wun-Jae Kim <sup>2</sup> and Yung Hyun Choi <sup>3,4,\*</sup>

<sup>1</sup> Laboratory of Immunobiology, Department of Marine Life Sciences, Jeju National University, Jeju 690-756, Korea; E-Mail: immunkim@cheju.ac.kr

<sup>2</sup> Department of Urology, Chungbuk National University College of Medicine, Cheongju 361-763, Korea; E-Mail: wjkim@chungbuk.ac.kr

<sup>3</sup> Department of Biochemistry, College of Oriental Medicine, Dongeui University, Busan 614-052, Korea

<sup>4</sup> Department of Biomaterial Control (BK21 program), Graduate School, and Blue-Bio Industry RIC, Dongeui University, Busan 614-052, Korea

\* Author to whom correspondence should be addressed; E-Mail: choiyh@deu.ac.kr; Tel.: +82-51-850-7413; Fax: +82-51-853-4036.

Received: 15 March 2013 / Accepted: 3 May 2013 / Published: 7 May 2013

---

It has been brought to our attention that the Figure 1 (page 2177) in our published paper [1] has some errors, we would like to change it to the following one:

**Figure 1.** Chemical structure of PTX-2 (**A**) (reproduced from [2]), Molecular Weight: 859.1; Molecular Formula: C<sub>47</sub>H<sub>70</sub>O<sub>14</sub>, and confocal imaging of actin cytoskeleton and morphology of hepatic cells (**B**). Panels (**a**) and (**c**) are fluorescence and transmission photographs of the control cells, respectively; panels (**b**) and (**d**) are from cells treated with 200 nM PTX-2. Arrows point to differences on the F-actin distribution between control and treated cells (bundles and dots, respectively). One cell is outlined in controls (**c**) and in cells incubated with PTX-2 (**d**) to show morphological changes. Images are representative of three independent experiments. Scale bar = 50 μm. (Note: Figure 1B is reproduced with permission from [3], copyright © 2008 British Pharmacological Society).

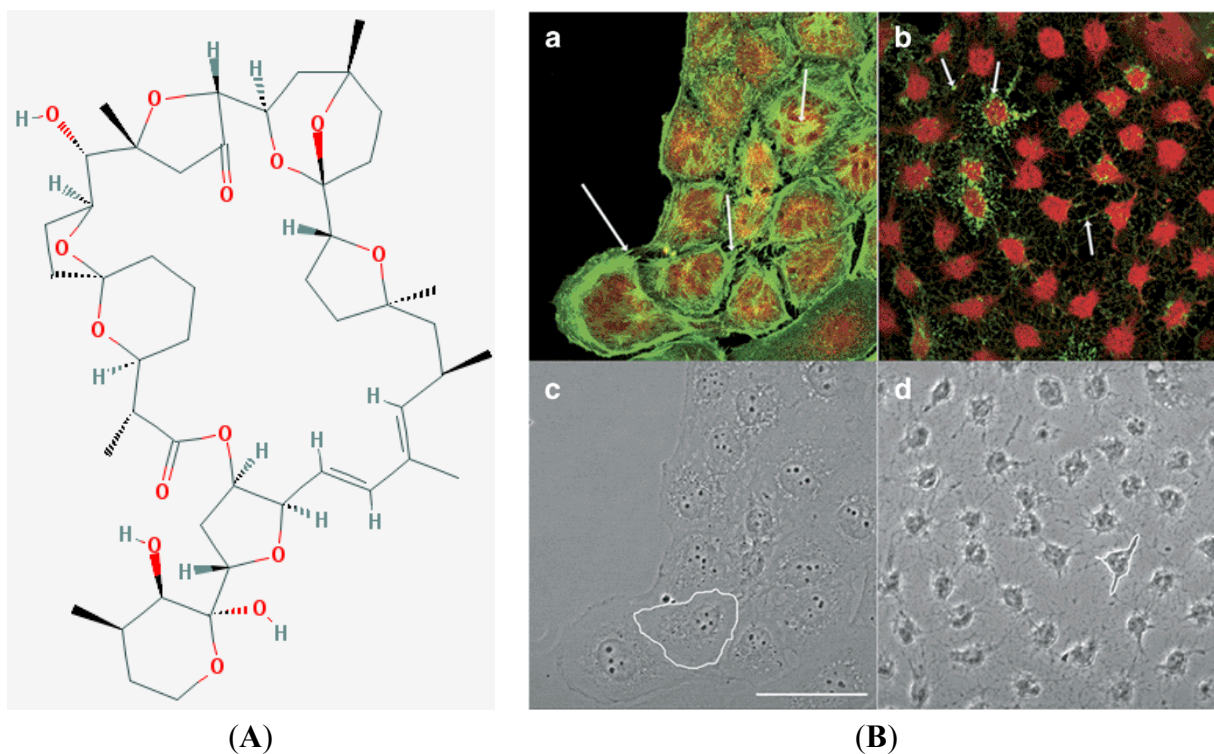

## References

1. Kim, G.-Y.; Kim, W.-J.; Choi, Y.H. Pectenotoxin-2 from Marine Sponges: A Potential Anti-Cancer Agent—A Review. *Mar. Drugs* **2011**, *9*, 2176–2187.
2. Pectenotoxin 2—Compound Summary (CID 6437385). Available online: <http://pubchem.ncbi.nlm.nih.gov/summary/summary.cgi?cid=6437385> (accessed on 8 February 2013).
3. Espiña, B.; Louzao, M.C.; Ares, I.R.; Cagide, E.; Vieytes, M.R.; Vega, F.V.; Rubiolo, J.A.; Miles, C.O.; Suzuki, T.; Yasumoto, T.; *et al.* Cytoskeletal toxicity of pectenotoxins in hepatic cells. *Br. J. Pharmacol.* **2008**, *155*, 934–944.

© 2013 by the authors; licensee MDPI, Basel, Switzerland. This article is an open access article distributed under the terms and conditions of the Creative Commons Attribution license (<http://creativecommons.org/licenses/by/3.0/>).
